# Supplementary material for: Affordability of fluoride toothpaste and national prevalence of untreated dental caries in low- and middle-income countries: an ecological cross-sectional study
Source: Research Square preprint supplement (doi:10.21203/rs.3.rs-7707685/v1), 2026-01-09
Supplement: Supplementary file 1 [file 01024d73da909aecbccb1231.docx]

**Supplementary File 1. Survey Questionnaire (English Version)**

**Purpose**

This questionnaire collects information on commonly used toothpastes in each country. Please list three products that are widely used by the general public (e.g., products commonly seen in supermarkets or pharmacies, or products frequently used by local office staff and their families).

**Instructions**

• Please attach clear photographs of the entire container. Ensure that all text on the packaging is legible.

**Respondent Details**

1. Name: ______________________________

2. Email address: ______________________

3. Country: ____________________________

4. City where the survey was conducted: ____________________________

5. Date of survey (DD-MMM-YYYY): __________________

**Product Information (enter for each product)**

**Product 1**

1) Product name: _______________________________________________

2) Manufacturer or distributor: _________________________________

3) Does the packaging indicate that fluoride is present? Yes / No / Unknown

4) Is the fluoride concentration indicated (ppm or %)? Yes / No / Unknown

5) Price (local currency): __________________________________

6) Net content (e.g., 100 g / 100 mL): ______________________

7) Place of purchase: Pharmacy / Supermarket / Retail shop / Other (______________)

8) Photo (entire container): [ ] Attached

**Product 2**

1) Product name: _______________________________________________

2) Manufacturer or distributor: _________________________________

3) Does the packaging indicate that fluoride is present? Yes / No / Unknown

4) Is the fluoride concentration indicated (ppm or %)? Yes / No / Unknown

5) Price (local currency): __________________________________

6) Net content (e.g., 100 g / 100 mL): ______________________

7) Place of purchase: Pharmacy / Supermarket / Retail shop / Other (______________)

8) Photo (entire container): [ ] Attached

**Product 3**

1) Product name: _______________________________________________

2) Manufacturer or distributor: _________________________________

3) Does the packaging indicate that fluoride is present? Yes / No / Unknown

4) Is the fluoride concentration indicated (ppm or %)? Yes / No / Unknown

5) Price (local currency): __________________________________

6) Net content (e.g., 100 g / 100 mL): ______________________

7) Place of purchase: Pharmacy / Supermarket / Retail shop / Other (______________)

8) Photo (entire container): [ ] Attached

Form ID: 1-(1) General Toothpaste Questionnaire
